# Supplementary material for: Physiological and genetic analysis of Arabidopsis thaliana anthocyanin biosynthesis mutants under chronic adverse environmental conditions
Source: PubMed Central journal article supplement — J Exp Bot. 2012 Nov 16;64(1):229–40. doi: 10.1093/jxb/ers328 (PMC3528034; doi:10.1093/jxb/ers328), 2012-11-16

## Supplementary

Fig S1. Wild type control and anthocyanin biosynthesis mutants showed differences in phenotype in response to challenging environmental conditions. Wild type (Ler) plants (A) accumulated anthocyanin and did not display early yellowing at 21 DAG. Anthocyanin biosynthesis mutants (B) displayed early yellowing as indicated by the arrow. Wild type plants, similar to *transparent testa* lines, do not show any signs of stress at 24 DAG when grown under optimal conditions (C).

Fig. S1

A)

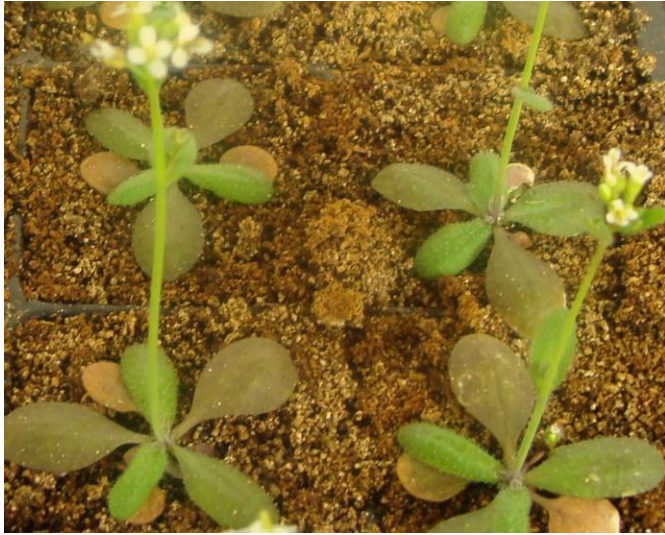

B)

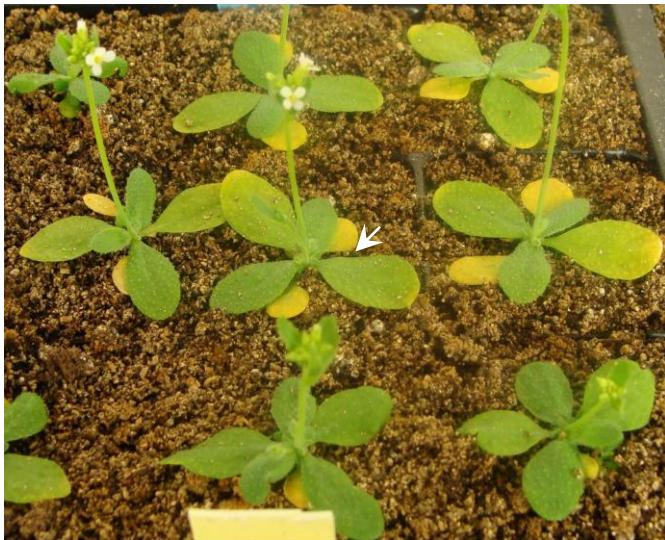

C)

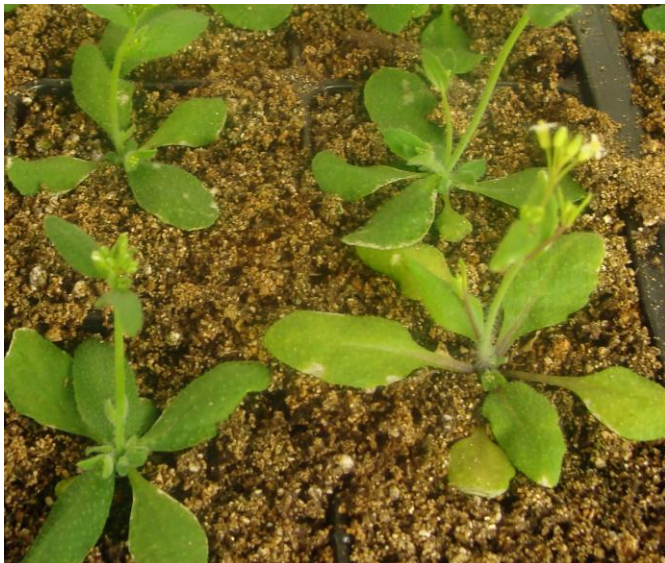

Supplement: supp_ers328_jexbot081786_file001.pdf [file supp_ers328_jexbot081786_file001.pdf]
